# Supplementary material for: Metabolomic Study of Urine from Workers Exposed to Low Concentrations of Benzene by UHPLC-ESI-QToF-MS Reveals Potential Biomarkers Associated with Oxidative Stress and Genotoxicity
Source: MDPI journal article supplement (doi:10.3390/metabo12100978), 2022-10-16
Supplement: s1 [file s1]

## Supplementary materials

**Table S1. Descriptive analysis and comparison between groups for sociodemographic variables.**

| Variables   |               | General |        | Environmental |        | Occupational |        | p-value |
|-------------|---------------|---------|--------|---------------|--------|--------------|--------|---------|
|             |               | N=60    | %      | N=28          | %      | N=32         | %      |         |
| Sex         | Female        | 7       | 11.66% | 4             | 14.29% | 2            | 6.25%  | 0.2473  |
|             | Male          | 53      | 88.33% | 24            | 85.71% | 30           | 93.75% |         |
| Age range   | 17-30 years   | 13      | 22.41% | 3             | 11.53% | 10           | 31.25% | 0.0386  |
|             | 30-40 years   | 14      | 24.13% | 4             | 15.38% | 10           | 31.25% |         |
|             | 40-50 years   | 19      | 32.75% | 13            | 50.00% | 6            | 18.75% |         |
|             | >= 50 years   | 12      | 20.71% | 6             | 23.09% | 6            | 18.75% |         |
| Tobacco use | Never smoked  | 37      | 61.70% | 17            | 60.71% | 20           | 62.50% | 0.9796  |
|             | Used to smoke | 15      | 25.00% | 7             | 25.00% | 8            | 25.00% |         |
|             | Smokers       | 8       | 13.30% | 4             | 14.28% | 4            | 12.50% |         |
| Alcohol use | Never drank   | 14      | 23.33% | 9             | 32.15% | 5            | 15.63% | 0.0789  |
|             | Used to drink | 7       | 11.70% | 5             | 17.85% | 2            | 6.25%  |         |
|             | Drinks        | 39      | 64.97% | 14            | 50.00% | 25           | 78.12% |         |

Note: 2 individuals from the environmental group did not inform their age.

**Table S2. Time of exercise in the current occupation for workers in the environmental and occupational groups exposed to benzene.**

| Environmental group |       |                    |                |
|---------------------|-------|--------------------|----------------|
| Time (months)       | Xi    | Individuals number | Percentage (%) |
| 10 -77              | 43.4  | 6                  | 27.27          |
| 78-145              | 111.2 | 3                  | 13.64          |
| 146-212             | 179.0 | 6                  | 27.27          |
| 213-280             | 246.8 | 5                  | 22.73          |
| 281-348             | 314.6 | 2                  | 9.09           |
| <b>Total</b>        |       | 22                 | 100            |
| Occupational group  |       |                    |                |
| Time (months)       | Xi    | Individuals number | Percentage (%) |
| 12 -78,3            | 45.2  | 16                 | 53.33          |
| 78,3 – 145          | 111.5 | 6                  | 20.00          |
| 145- 211            | 177.8 | 1                  | 3.33           |
| 211-277             | 244.2 | 3                  | 10.00          |
| 277-343             | 310.5 | 1                  | 3.33           |
| 343-210             | 376.8 | 3                  | 10.00          |
| <b>Total</b>        |       | 30                 | 100            |

\* Xi= average working time in current occupation in months

**Table S3. Descriptive analysis and comparison between groups for biomarkers of exposure, effect and biochemical and hematological parameters.**

| Variables            |                                               | Group         |                   | p-value                |               |
|----------------------|-----------------------------------------------|---------------|-------------------|------------------------|---------------|
|                      |                                               |               |                   |                        |               |
|                      |                                               | Environmental | Occupational      |                        |               |
|                      |                                               | N = 28        | Average (SD)      | N= 32 Average (SD)     |               |
| Exposure Biomarkers  | SPMA (µg/gcreatinine)                         |               | 1.25 (1.1)        | 1.79 (2.1)             | 0.2793        |
|                      | AttM (mg/gcreatinine)                         |               | 0.19 (0.13)       | 0.22 (0.21)            | 0.6618        |
| Complete blood count | Red Cells (10 <sup>6</sup> /mm <sup>3</sup> ) | 48603         | 12.50 (528805.60) | 4723571.86 (429998.60) | 0.4955        |
|                      | Hb (g/dL)                                     |               | 14.00 (1.20)      | 13.40 (1.20)           | 0.0575        |
|                      | HT (%)                                        |               | 40.40 (3.20)      | 42.40 (3.60)           | <b>0.0253</b> |
|                      | MCV (fL)                                      |               | 86.50 (4.50)      | 87.80 (4.20)           | 0.2160        |
|                      | MCH (pg)                                      |               | 29.70 (2.10)      | 30.0 (2.20)            | 0.6946        |
|                      | MCHC (g/dL)                                   |               | 34.30 (1.10)      | 34.20 (1,70)           | 0.4109        |
|                      | RDW (%)                                       |               | 12.0 (2.10)       | 11.70 (0.50)           | <b>0.0120</b> |
|                      | Total leucocytes count (mm <sup>3</sup> )     |               | 6341.8 (1553.6)   | 6391.8 (1915.9)        | 0.9127        |
|                      | Neutrophils (%)                               |               | 54.60 (7.50)      | 56.40 (10.10)          | 0.4339        |

|                          |                                                 |                      |                     |               |
|--------------------------|-------------------------------------------------|----------------------|---------------------|---------------|
|                          | Neutrophils (mm <sup>3</sup> )                  | 3632.44 (1061.71)    | 3706.86 (1403.21)   | 0.6018        |
|                          | Eosinophils (%)                                 | 4.30 (4.20)          | 3.10 (2.30)         | 0.4366        |
|                          | Eosinophils (mm <sup>3</sup> )                  | 285,00 (320,50)      | 188.00 (137.80)     | 0.4633        |
|                          | Basophils (%)                                   | 0.0 (0.0)            | 1.00 (0.90)         | <b>0.0118</b> |
|                          | Basophils (mm <sup>3</sup> )                    | 0.0 (0.0)            | 55.90 (54.70)       | <b>0.0000</b> |
|                          | Monocytes (%)                                   | 6.70 (2.40)          | 7.70 (1.60)         | <b>0.0118</b> |
|                          | Monocytes (mm <sup>3</sup> )                    | 415.13 (126.99)      | 481.30 (141.10)     | <b>0.0441</b> |
|                          | Lymphocytes (%)                                 | 34.40 (6.40)         | 31.80 (8.30)        | 0.1807        |
|                          | Lymphocytes (mm <sup>3</sup> )                  | 2099.40 (515.60)     | 1983.30 (690.20)    | 0.4684        |
|                          | Platelets (mm <sup>3</sup> )                    | 230214.30 (46124.90) | 284184.40 (47964.7) | 0.2565        |
| Biochemical Markers      | AST (U/L)                                       | 22.0 (9.00)          | 29.10 (11.90)       | <b>0.0113</b> |
|                          | ALT (U/L)                                       | 27.30 (16.70)        | 22.40 (11.90)       | 0.2539        |
|                          | Total Bilirubin (mg/dL)                         | 0.37 (0.19)          | 0.46 (0.32)         | 0.3018        |
|                          | Direct Bilirubin (mg/dL)                        | 0.11 (0.06)          | 0.15 (0.08)         | <b>0.0367</b> |
|                          | Indirect Bilirubin (mg/dL)                      | 0.26 (0.13)          | 0.34 (0.23)         | 0.1307        |
|                          | γ GT (U/L)                                      | 38.10 (24.72)        | 41.34 (30.0)        | 0.8764        |
|                          | Rheumatoid Factor (UI/mL)                       | 1.24 (0.66)          | 1.19 (0.49)         | 0.9941        |
| Micronuclei              | micronuclei (Mn/1000cells)                      | 0.69 (0.53)          | 1.12 (1.19)         | 0.2329        |
| Comet Assay              | FPG-EC(%tail intensity)                         | 39.46 (24.29)        | 35.03 (26.35)       | 0.5346        |
| Oxidative Stress Markers | CAT (kU/L)                                      | 39.01 (13.63)        | 39.44 (28.23)       | 0.6132        |
|                          | GST (kU/L)                                      | 13.57 (3.97)         | 17.09 (9.99)        | 0.9424        |
|                          | Thiol (kU/L)                                    | 0.44 (0.05)          | 0.40 (0.09)         | <b>0.0261</b> |
|                          | MDA (kU/L)                                      | 1.28 (0.76)          | 3.48 (4.39)         | <b>0.0000</b> |
|                          | SOD (kU/L)                                      | 5.12 (18.08)         | 2.11 (1.21)         | 0.4104        |
| Chromosomal aberrations  | Number of chromosome breaks (breaks s/100cells) | 1.16 (2.73)          | 8.06 (13.55)        | <b>0.0017</b> |
|                          | Number of fragments (Frag/100 cells)            | 3.24 (5.46)          | 14.40 (25.94)       | <b>0.0027</b> |

Number metaphases  
with premature  
separation of  
chromatids  
(MCP/100cells)

2.48 (2.73)

2.12 (5.16)

0.0303

Hb=hemoglobin, HT=hematocrit, MCV=Mean Corpuscular Volume, MHC=Mean Corpuscular Hemoglobin, CHCM= Mean Corpuscular Hemoglobin Concentration, RDW= Distribution Range of Red Blood Cells,aspartate; Hb=hemoglobin, HT=hematocrit, MCV=Mean Corpuscular Volume, MHC=Mean Corpuscular Hemoglobin, CHCM= Mean Corpuscular Hemoglobin Concentration, RDW= Distribution Range of Red Blood Cells,= gamma glutamyl transferase; CAT= catalase; SOD = superoxide dismutase; THIOL= thiol groups; MDA= malondialdehyde (MDA); GST= glutathione S-transferase; S-PMA = S- phenylmercapturic acid; *tt*MA = *trans,trans*-muconic acid; C-FPG = enzyme formamidopyrimidine DNA glycosylase (C-FPG). The genotoxicity was measured by metaphases with chromosomal abnormalities (MCA) and nuclear abnormalities, comet assay using the enzyme formamidopyrimidine DNA glycosylase (C-FPG).

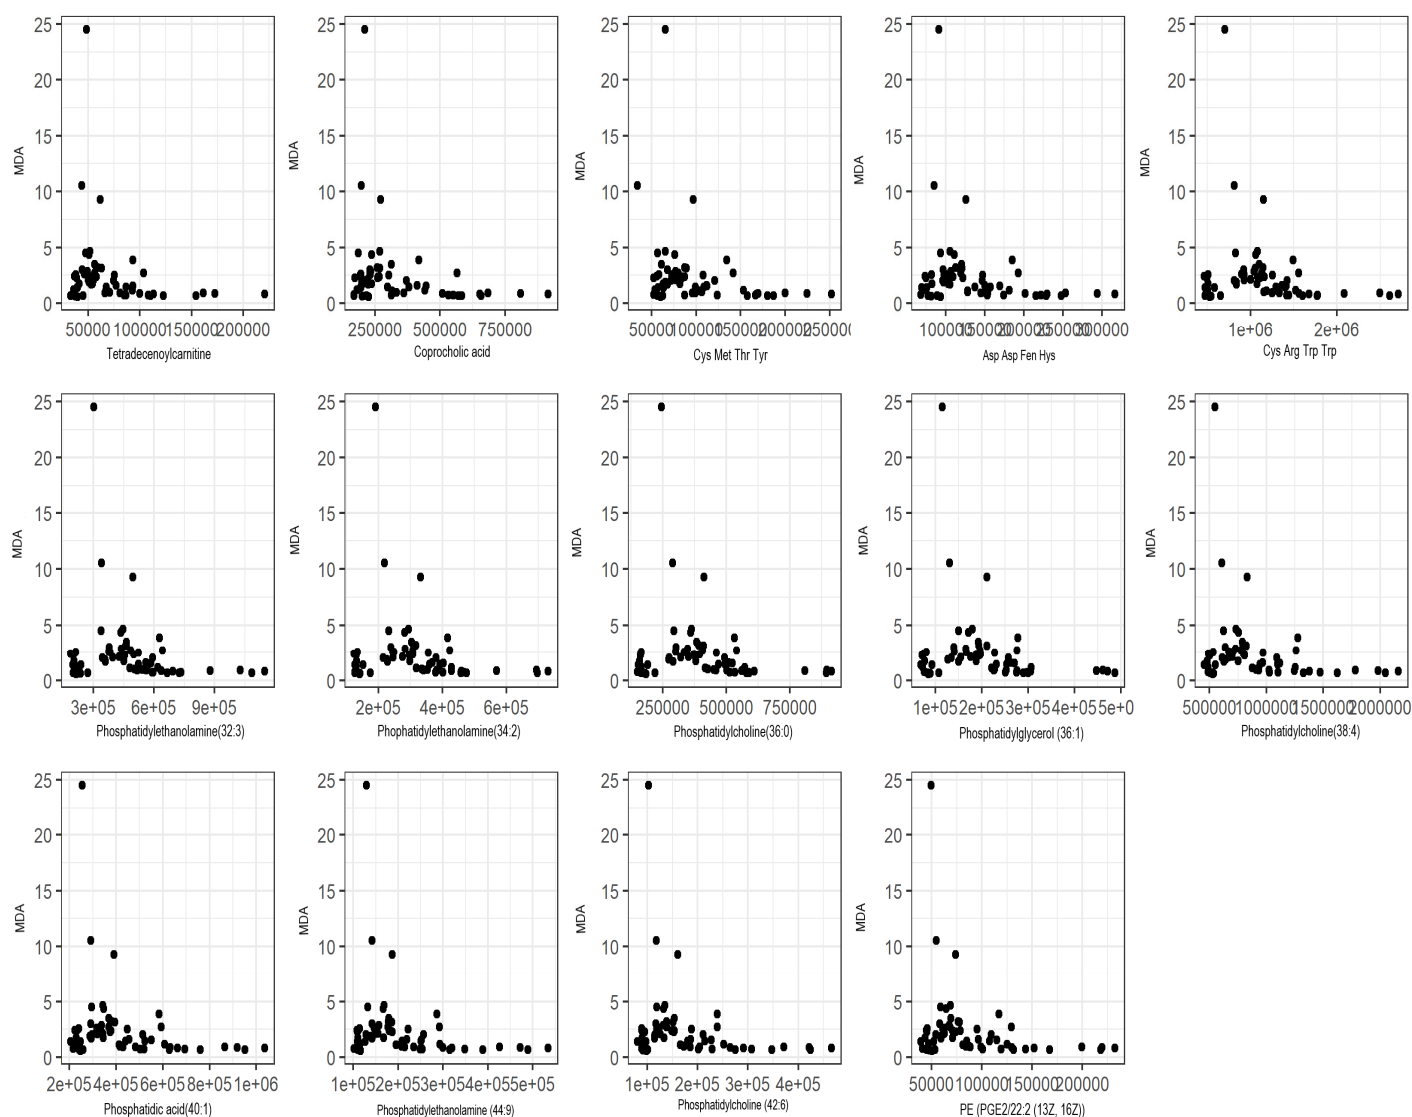

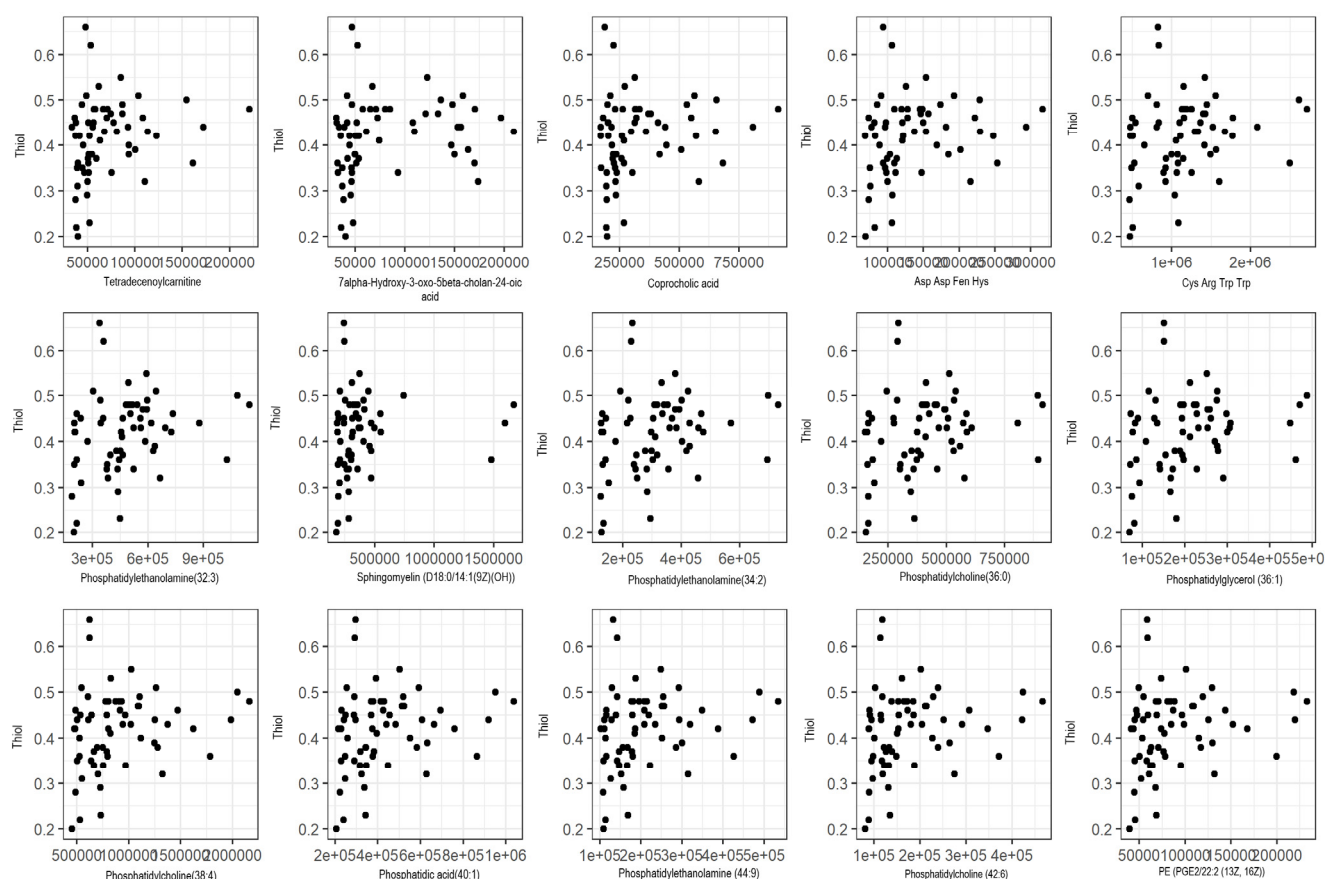

**Figure S1.** Scatter diagrams between some metabolites and Thiol and MDA.

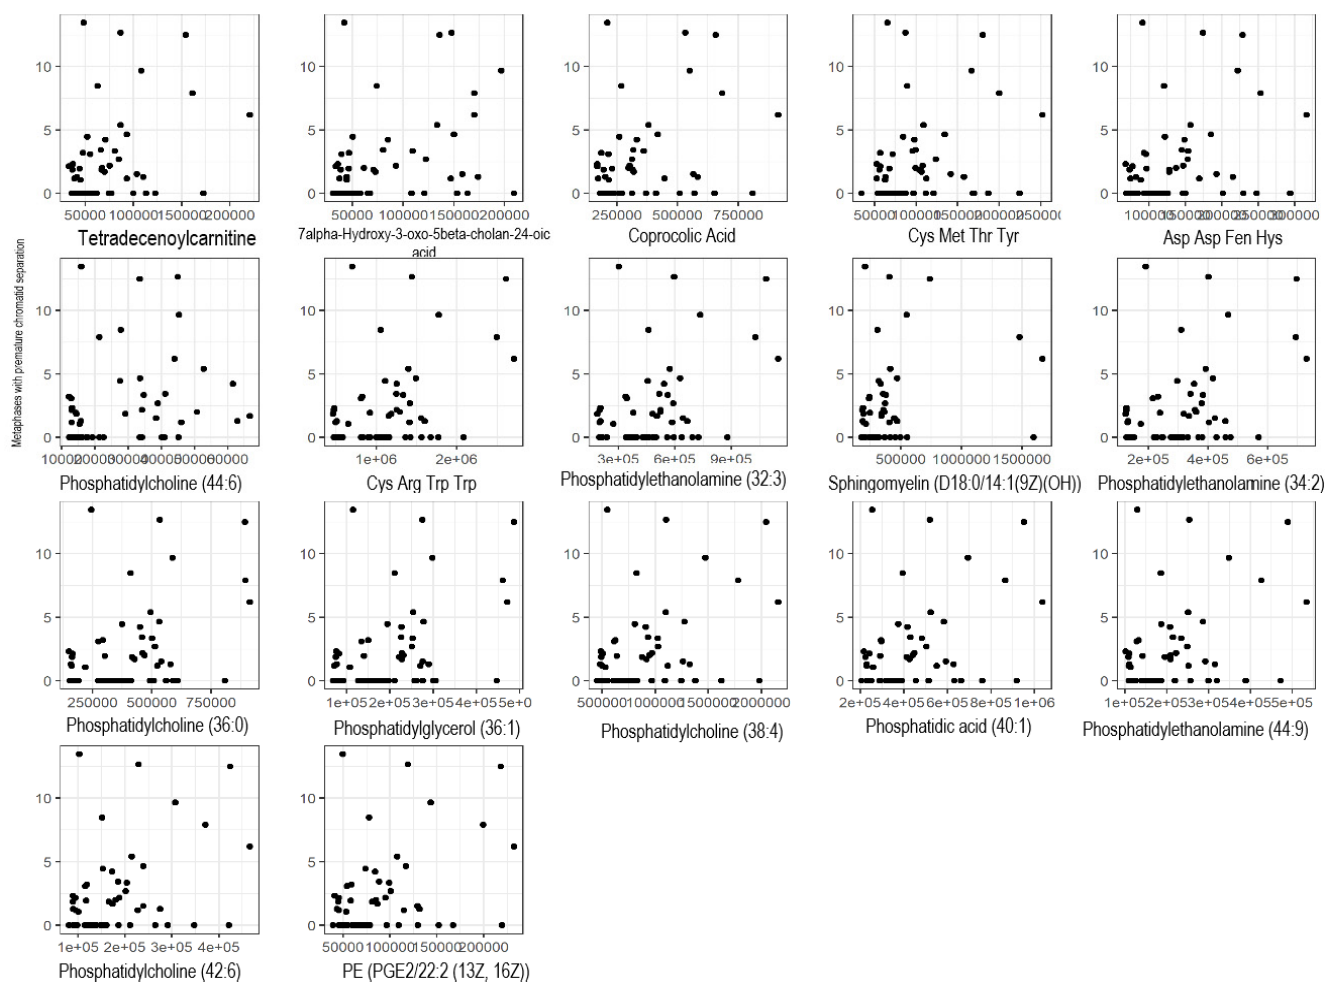

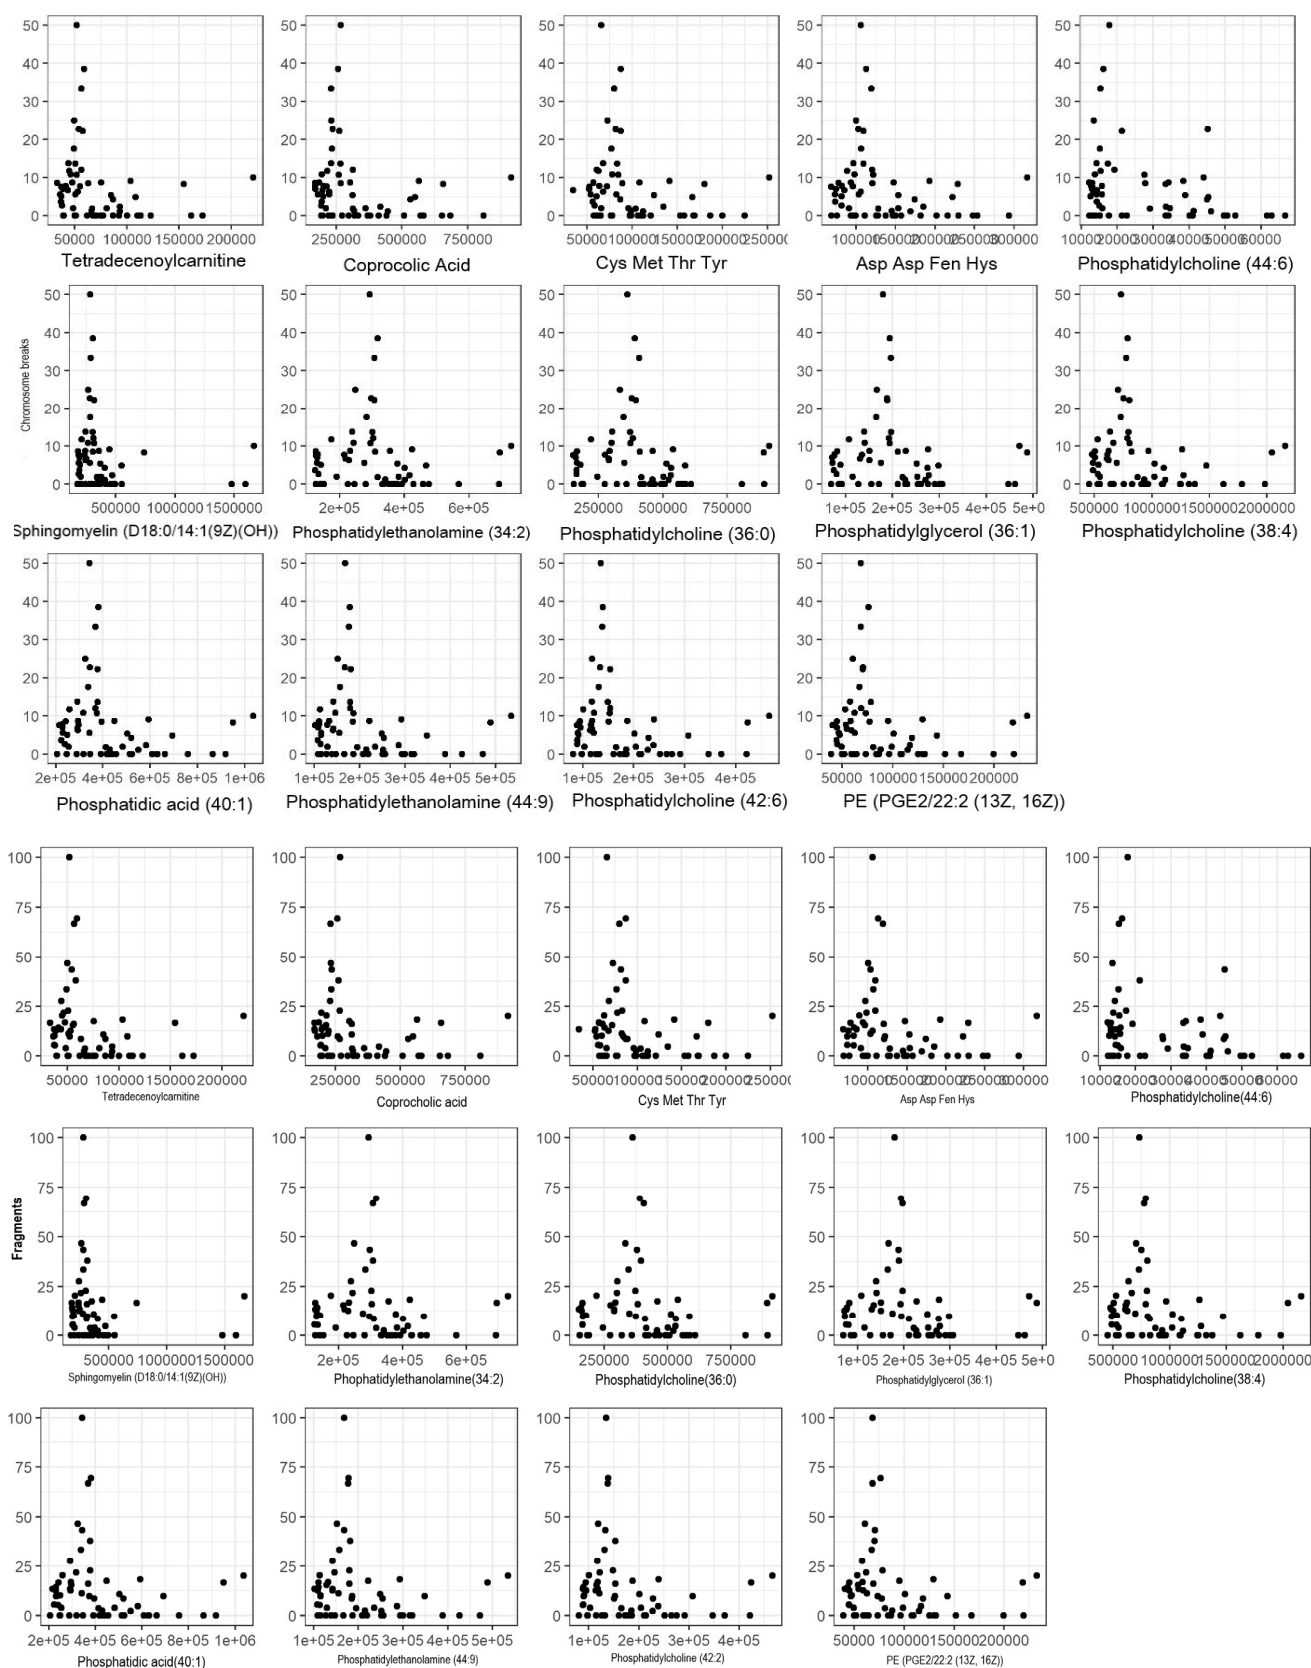

**Figure S2.** Scatter diagrams between some metabolites and chromosome breaks, fragment and metaphases presenting premature chromatid separation.

**Table S4-** Spearman correlation between urinary metabolites and oxidative stress markers.

|                                                                                  | CAT            |         | GST            |         | THIOL          |         | MDA            |         | SOD            |         |
|----------------------------------------------------------------------------------|----------------|---------|----------------|---------|----------------|---------|----------------|---------|----------------|---------|
|                                                                                  | P <sup>1</sup> | p value |
| Phenylalanylhydroxyproline                                                       | -0.068         | 0.605   | 0.205          | 0.116   | 0.083          | 0.531   | -0.342         | 0.007   | -0.012         | 0.928   |
| Sphingomyelin (d18:1/16:0)                                                       | -0.019         | 0.887   | 0.162          | 0.218   | 0.149          | 0.256   | -0.356         | 0.005   | -0.002         | 0.987   |
| 1,21-Henicosanediol                                                              | 0.008          | 0.949   | -0.017         | 0.897   | 0.047          | 0.721   | 0.007          | 0.957   | 0.007          | 0.960   |
| Tetradecenoylcarnitine                                                           | 0.114          | 0.386   | 0.264          | 0.041   | 0.314          | 0.014   | -0.272         | 0.036   | -0.215         | 0.099   |
| 7alpha-Hydroxy-3-oxo-5beta-cholan-24-oic acid                                    | 0.091          | 0.490   | 0.275          | 0.033   | 0.333          | 0.009   | -0.216         | 0.098   | -0.183         | 0.161   |
| Testosterone glucuronide                                                         | 0.034          | 0.796   | 0.268          | 0.039   | 0.273          | 0.035   | -0.306         | 0.017   | -0.267         | 0.039   |
| Phosphatidylglycerol (36:1)                                                      | -0.146         | 0.267   | -0.079         | 0.548   | 0.153          | 0.242   | -0.083         | 0.528   | 0.274          | 0.034   |
| Coprocholic acid                                                                 | 0.135          | 0.303   | 0.302          | 0.019   | 0.238          | 0.067   | -0.305         | 0.018   | -0.280         | 0.030   |
| Folic acid                                                                       | 0.064          | 0.627   | 0.281          | 0.030   | 0.331          | 0.010   | -0.276         | 0.033   | -0.251         | 0.053   |
| Asp Leu                                                                          | 0.097          | 0.459   | 0.246          | 0.058   | 0.236          | 0.069   | -0.310         | 0.016   | -0.223         | 0.087   |
| Cys Met Thr Tyr                                                                  | 0.141          | 0.282   | 0.266          | 0.040   | 0.214          | 0.100   | -0.303         | 0.019   | -0.236         | 0.070   |
| 1-(9Z-heptadecenoyl)-2-(7Z,10Z,13Z,16Z-docosatetraenoyl)-glycero-3-phosphoserine | 0.086          | 0.514   | 0.295          | 0.022   | 0.281          | 0.030   | -0.275         | 0.034   | -0.260         | 0.045   |
| Cys Hys Ser Trp                                                                  | 0.030          | 0.817   | 0.275          | 0.033   | 0.254          | 0.051   | -0.248         | 0.056   | -0.261         | 0.044   |
| Asp Asp Fen Hys                                                                  | 0.054          | 0.680   | 0.287          | 0.026   | 0.283          | 0.028   | -0.246         | 0.059   | -0.275         | 0.034   |
| Cys Arg Trp Trp                                                                  | 0.044          | 0.739   | 0.292          | 0.024   | 0.247          | 0.057   | -0.196         | 0.132   | -0.401         | 0.002   |
| Phosphatidylethanolamine(32:3)                                                   | 0.113          | 0.391   | 0.297          | 0.021   | 0.291          | 0.024   | -0.265         | 0.041   | -0.262         | 0.043   |
| Sphingomyelin (D18: 0/14: 1 (9Z) (OH))                                           | 0.103          | 0.433   | 0.308          | 0.017   | 0.303          | 0.019   | -0.265         | 0.041   | -0.264         | 0.042   |



|                                                  |        |       |       |       |       |       |        |       |        |       |
|--------------------------------------------------|--------|-------|-------|-------|-------|-------|--------|-------|--------|-------|
| Trp Gln Asp Cys Glu                              | 0.087  | 0.511 | 0.312 | 0.015 | 0.284 | 0.028 | -0.256 | 0.049 | -0.270 | 0.037 |
| Tetrahydropteroyltri-L-glutamic acid             | 0.039  | 0.770 | 0.294 | 0.022 | 0.321 | 0.012 | -0.330 | 0.010 | -0.213 | 0.103 |
| Phosphatidic acid PA(18:1(12Z)-2OH(9,10)/i-15:0) | -0.005 | 0.969 | 0.300 | 0.020 | 0.240 | 0.065 | -0.348 | 0.006 | -0.278 | 0.031 |
| Phosphatidylcholine(32:1)                        | 0.095  | 0.472 | 0.304 | 0.018 | 0.268 | 0.038 | -0.253 | 0.051 | -0.256 | 0.048 |
| Phosphatidylethanolamine(34:2)                   | 0.096  | 0.464 | 0.306 | 0.017 | 0.286 | 0.027 | -0.258 | 0.047 | -0.259 | 0.045 |
| 1-Methylinosine                                  | 0.107  | 0.414 | 0.295 | 0.022 | 0.277 | 0.032 | -0.256 | 0.049 | -0.261 | 0.044 |
| Phosphatidylethanolamine(35:0)                   | 0.121  | 0.358 | 0.291 | 0.024 | 0.274 | 0.034 | -0.253 | 0.051 | -0.251 | 0.053 |
| Heptadecanoic carnitine                          | 0.081  | 0.539 | 0.293 | 0.023 | 0.291 | 0.024 | -0.269 | 0.038 | -0.262 | 0.043 |
| Phosphatidylcholine(36:0)                        | 0.064  | 0.625 | 0.301 | 0.019 | 0.290 | 0.025 | -0.266 | 0.040 | -0.252 | 0.052 |
| Phosphatidylethanolamine(22:5)                   | 0.096  | 0.468 | 0.297 | 0.021 | 0.268 | 0.038 | -0.255 | 0.049 | -0.279 | 0.031 |
| Phosphatidylcholine(38:4)                        | 0.091  | 0.489 | 0.308 | 0.017 | 0.266 | 0.040 | -0.256 | 0.048 | -0.251 | 0.053 |
| Phosphatidic acid(40:1)                          | 0.090  | 0.493 | 0.299 | 0.021 | 0.287 | 0.026 | -0.273 | 0.035 | -0.253 | 0.051 |
| Phosphatidylcholine(34:1)                        | 0.093  | 0.480 | 0.295 | 0.022 | 0.275 | 0.034 | -0.261 | 0.044 | -0.262 | 0.043 |
| Phosphatidylserine(38:1)                         | 0.088  | 0.503 | 0.296 | 0.022 | 0.277 | 0.032 | -0.259 | 0.045 | -0.252 | 0.052 |
| Phosphatidylethanolamine(44:9)                   | 0.099  | 0.454 | 0.307 | 0.017 | 0.285 | 0.028 | -0.257 | 0.047 | -0.257 | 0.047 |
| Phosphatidylcholine(22:2)                        | 0.089  | 0.501 | 0.304 | 0.018 | 0.294 | 0.023 | -0.262 | 0.043 | -0.262 | 0.043 |
| Phosphatidylcholine(42:6)                        | 0.100  | 0.448 | 0.299 | 0.020 | 0.289 | 0.025 | -0.256 | 0.048 | -0.242 | 0.063 |
| Phosphatidylcholine(40:3)                        | 0.082  | 0.536 | 0.288 | 0.026 | 0.288 | 0.026 | -0.261 | 0.044 | -0.257 | 0.048 |
| Phosphatidylethanolamine PGE2/22:2(13Z,16Z)      | 0.095  | 0.473 | 0.289 | 0.025 | 0.263 | 0.043 | -0.281 | 0.029 | -0.238 | 0.067 |
| Phosphatidylcholine(42:2)                        | 0.079  | 0.547 | 0.311 | 0.015 | 0.285 | 0.027 | -0.274 | 0.034 | -0.279 | 0.031 |
| Phosphatidylcholine(44:6)                        | 0.075  | 0.569 | 0.310 | 0.016 | 0.293 | 0.023 | -0.270 | 0.037 | -0.252 | 0.052 |

P<sup>1</sup>: Spearman's Correlation Coefficient; p-values were calculated from nonparametric Mann-Whitney test. Note: S-phenylmercapturic Acid (SPMA) and *trans-trans*-muconic acid (*t,t*-MA).

**Table S5. Correlation between candidate metabolites for exposure biomarkers and working time in the current occupation.**

| <b>Metabolites</b>                     | <b>p-value</b> | <b>P<sup>1</sup></b> |
|----------------------------------------|----------------|----------------------|
| 1,21-Henicosanediol                    | 0.185          | -0.106               |
| Tetradecenoylcarnitine                 | 0.765          | -0.040               |
| Coprocholic acid                       | 0.880          | 0.020                |
| Cys Met Thr Tyr                        | 0.774          | -0.037               |
| Asp Leu                                | 0.544          | -0.079               |
| Phenylalanylhdroxyproline              | 0.428          | -0.105               |
| Cys Hys Ser Trp                        | 0.396          | -0.111               |
| Sphingomyelin (D18: 0/14: 1 (9Z) (OH)) | 0.5071         | -0.087               |
| PE (PGE2/22:2 (13Z, 16Z))              | 0.637          | -0.010               |
| Phophatidylethanolamine(44:9)          | 0.567          | -0.075               |

P<sup>1</sup>= Spearman's Correlation Coefficient.
